# Supplementary material
Source: publisher figshare collection journal article supplement (https://tandf.figshare.com/ndownloader/files/28691753)
Supplement: Supplementary file 1 [file 28691753]

**Supplementary information for the article: ‘Appraising the community in community-based tourism’(DOI:10.1080/14616688.2021.1943702)**

**Appendix A: Coding of key informant interviews which are directly quoted in this study**

| **Informant** | **Code** | **Informant** | **Code** |
| --- | --- | --- | --- |
| Malay researcher, interview conducted on May 1, 2018 | MS1 | Malay tour guide 2, December 18, 2017 | MT2 |
| Malay scholar (i.e. who direct a tourism program), April 25, 2015 | MS2 | Malay tour guide 3, December 18, 2017 | MT3 |
| Malay resident 1, May 1, 2018 | MR1 | Batek leader, January 2017 | B1 |
| Malay tour guide 1, July 6, 2017 | MT1 | Malaysian Chinese leader (i.e. the tour agent manager), December 20, 2017 | C1 |

**Appendix B: Backgrounds of the three ethnic groups in Taman Negara**

|  | **Orang Asli Batek** | **Malays** | **Malaysian Chinese** |
| --- | --- | --- | --- |
| **% of Malaysia population** | 0.03%  (~1900 persons) | 50.3% | 24.6% |
| **Predominant religion(s)** | Animism | Islam | Buddhism, Christianity, Atheist |
| **Mother language** | Batek (Mon-Khmer, Austroasiatic) | Bahasa Melayu  (Austronesian) | Chinese dialects |
| **First settlement in Malaysia** | Over 8,000 years ago | Around 1st century BC | Around 15th century |
| **Primary livelihood in Taman Negara** | Hunting-gathering and trading of forest products | Tourism  (guides, homestay, boat operators etc.) | Tourism  (tour agents, hotel owners) |
| **Secondary livelihood inTaman Negara** | Tourism  (cultural tours and boatmen) | - | - |
| **Population involved in tourism** | Approx. 200  (seasonal) | Approx.1500  (seasonal) | Approx.15  (members of the tour agents) |

Sources: (Andaya, 2002, Bellwood, 1996, Department of Statistics Malaysia, 2010).

**References for the appendices:**

Andaya, L. Y. (2002). Orang Asli and the Melayu in the History of the Malay Peninsula. Journal of the Malaysian Branch of the Royal Asiatic Society, 75(1 (282)), 23–48.

Bellwood, P. (1996). Hierarchy, founder ideology and Austronesian expansion. In J. J. Fox & C. Sather (Eds.), Origins, Ancestry and Alliance: Explorations in Austronesian Ethnography (pp. 19–41). Australian National University E Press.

Department of Statistics Malaysia. (2010). Population Distribution and Basic Demographic Characteristic Report 2010 (Ethnic composition). Department of Statistics Malaysia.
